# Supplementary material for: Identifying the Role of Disulfidptosis in Endometrial Cancer via Machine Learning Methods
Source: MDPI journal article supplement (doi:10.3390/biomedinformatics3040056), 2023-10-13
Supplement: s1 [file s1]

## **Introduction of Figure:**

Figure S1. The correlation between 14 potentially sensitive drugs for the treatment of UCEC and the risk score, as well as the difference in IC50 values between high and low risk groups.

## **Introduction of Table:**

Table S1. 15 miRNAs with targeted relationships with LRPPRC.

Table S2. 8 lncRNAs with targeted relationships with hsa-miR-616-5p.

Table S3. 2 lncRNAs with targeted relationships with hsa-miR-4658.
