# Supplementary figures and images for: Identifying the Role of Disulfidptosis in Endometrial Cancer via Machine Learning Methods
Source: MDPI journal article supplement (doi:10.3390/biomedinformatics3040056), 2023-10-13

Risk  low  high

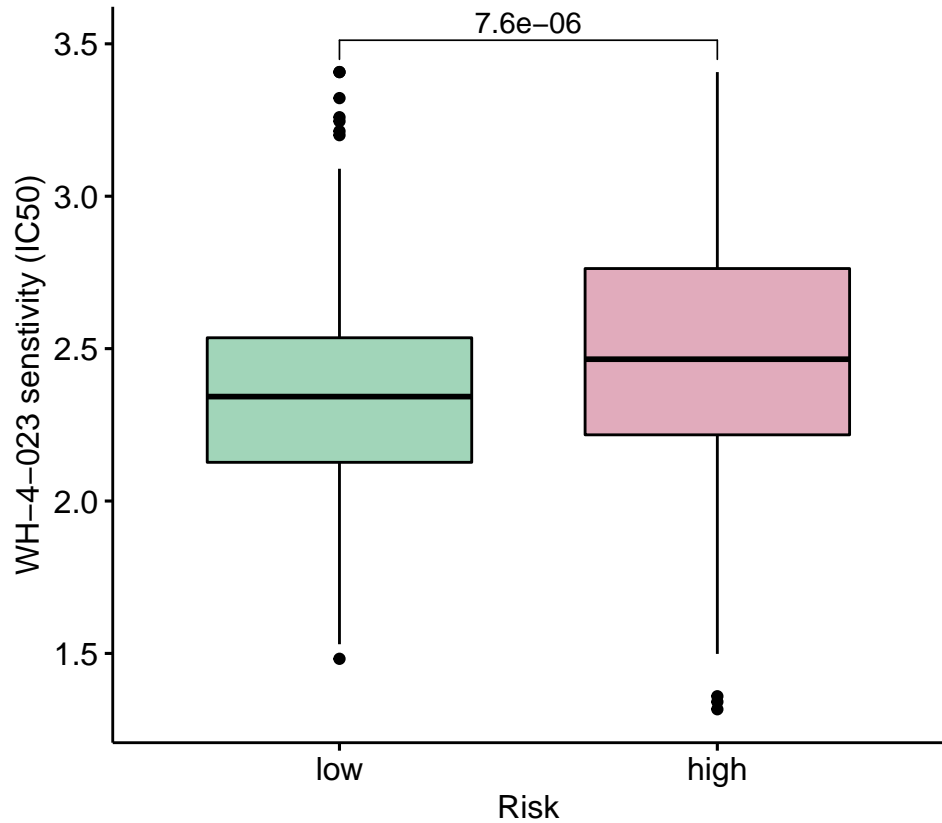

Supplement: s1 [file s1]

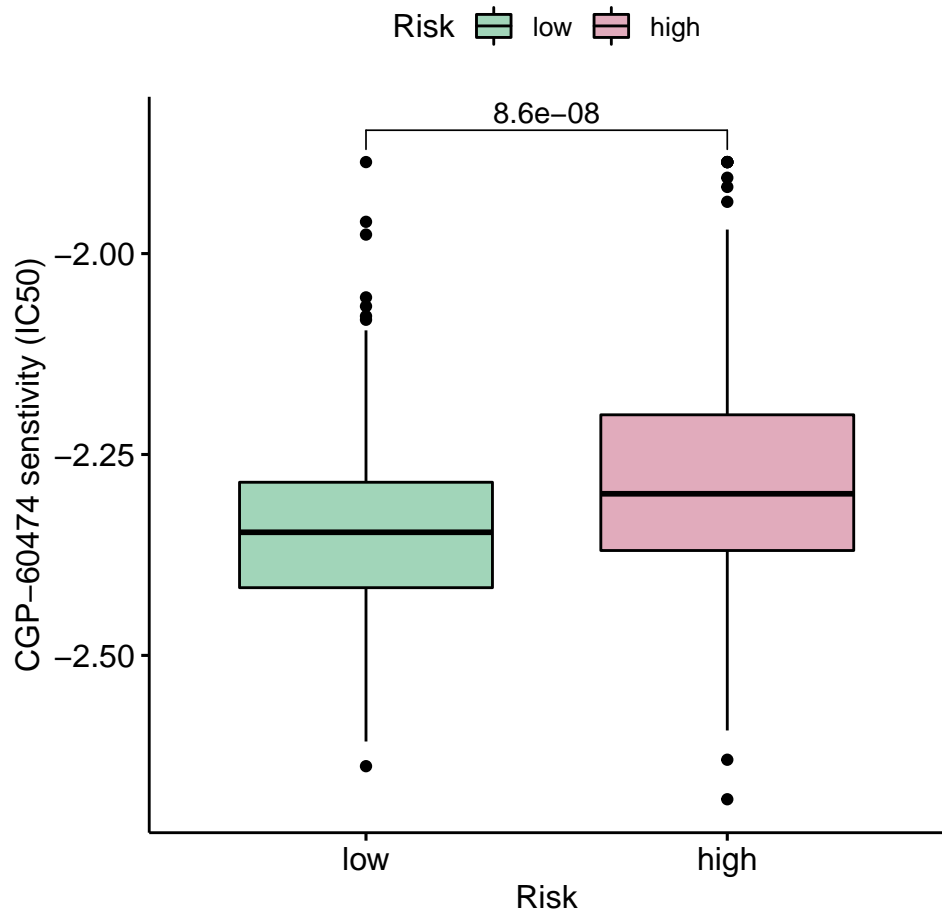

Supplement: s1 [file s1]

CGP-60474 sensitivity (IC50)

$R = 0.25, p = 2.1\text{e-}09$

Risk score

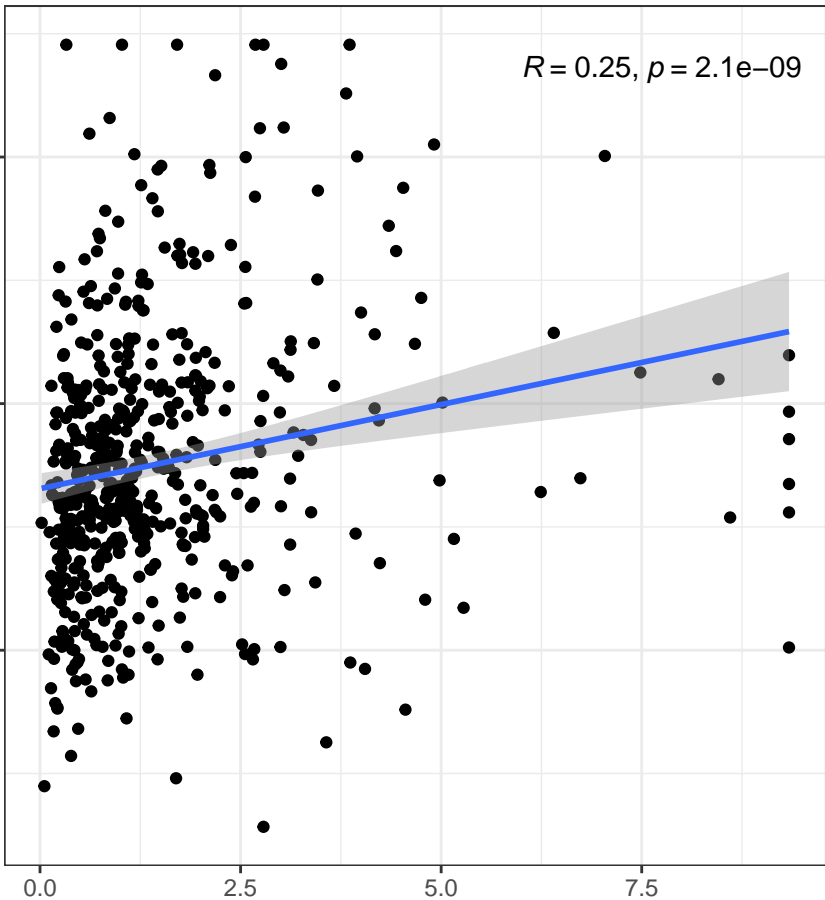

Supplement: s1 [file s1]

Risk  low  high

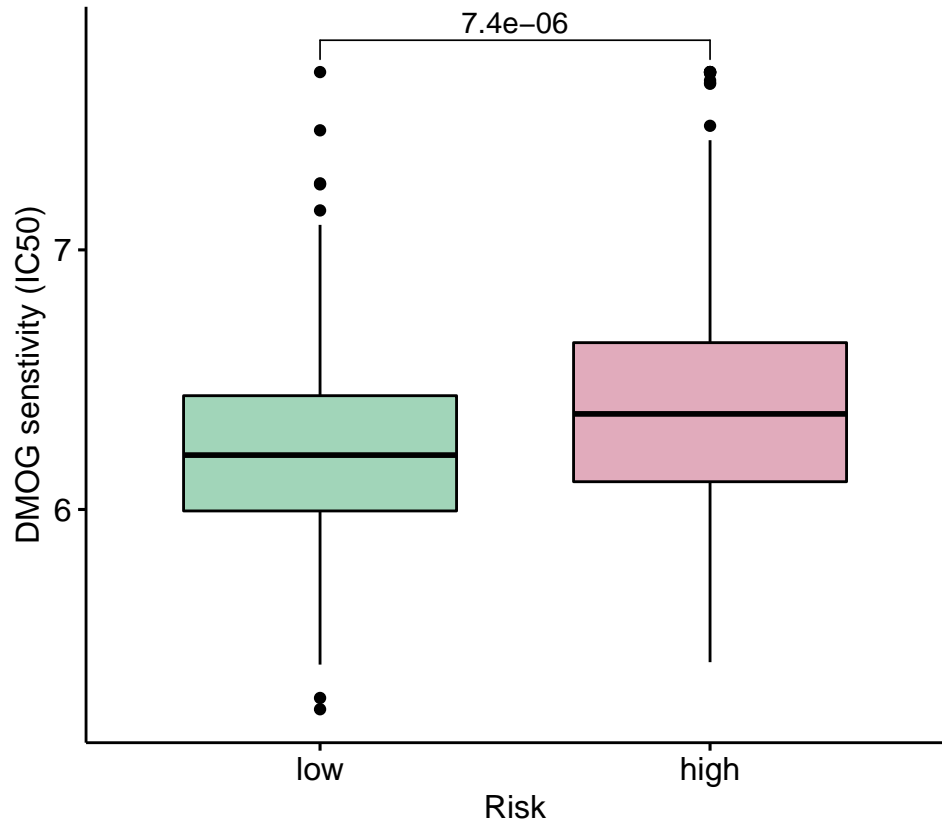

Supplement: s1 [file s1]

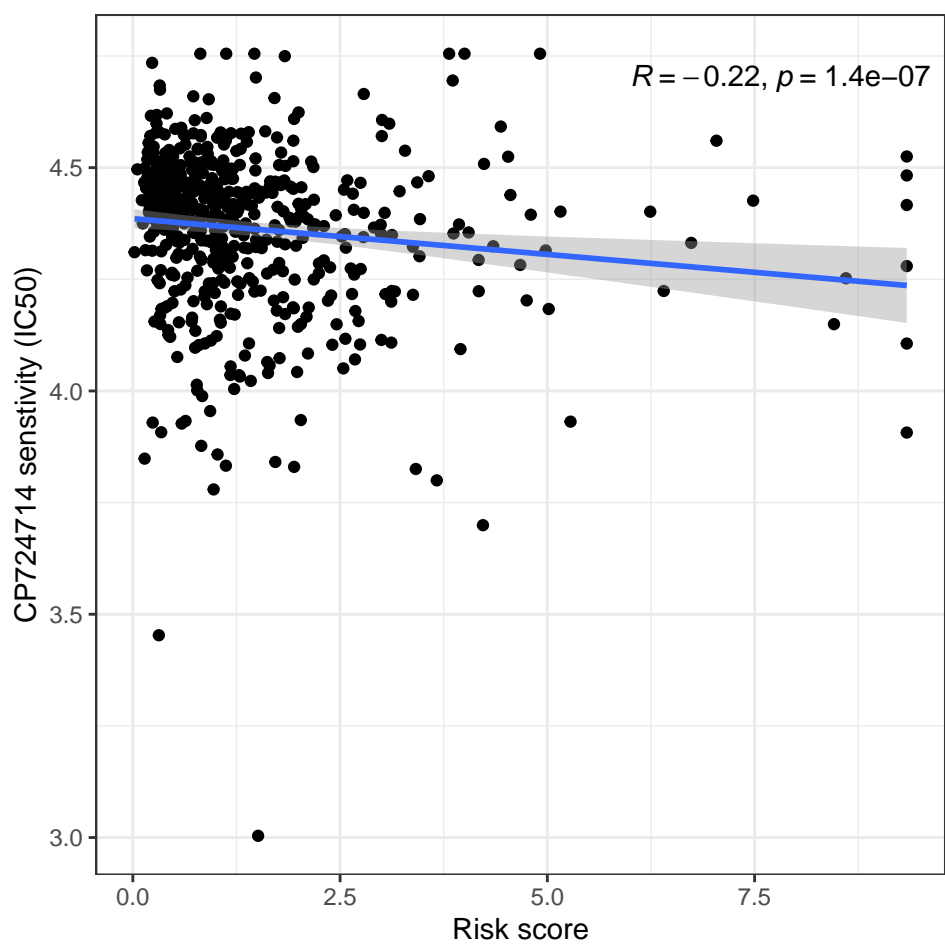

Supplement: s1 [file s1]

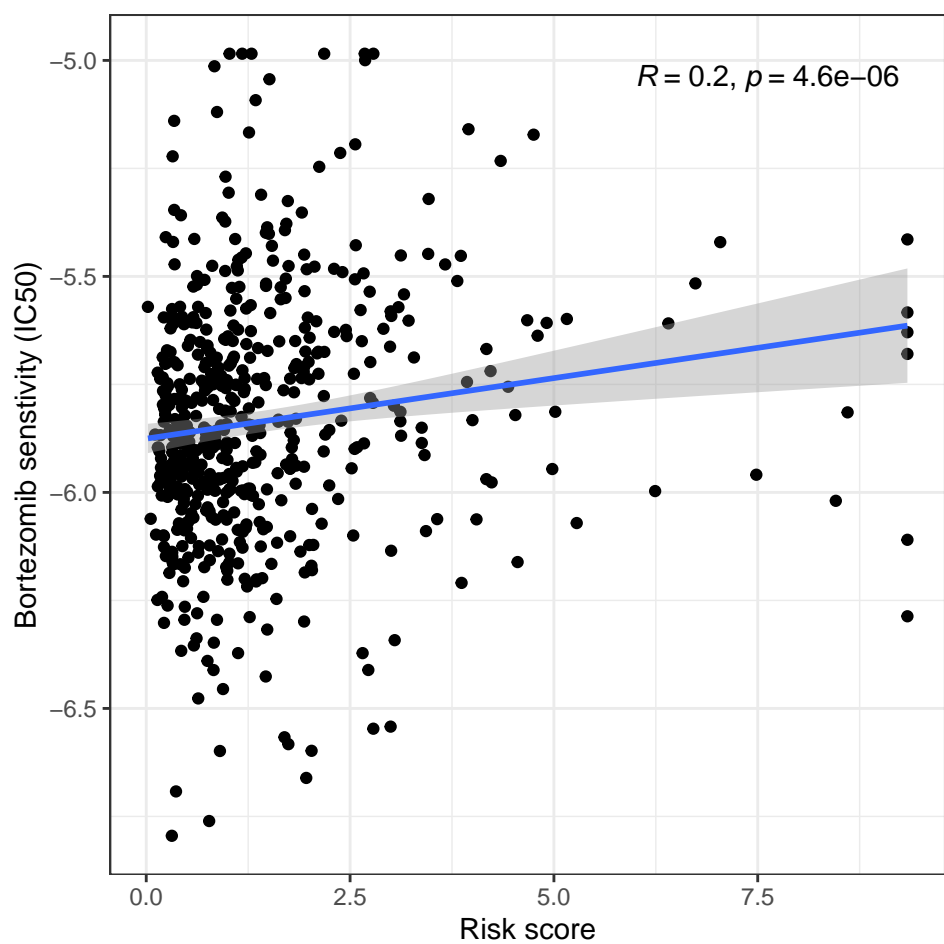

Supplement: s1 [file s1]

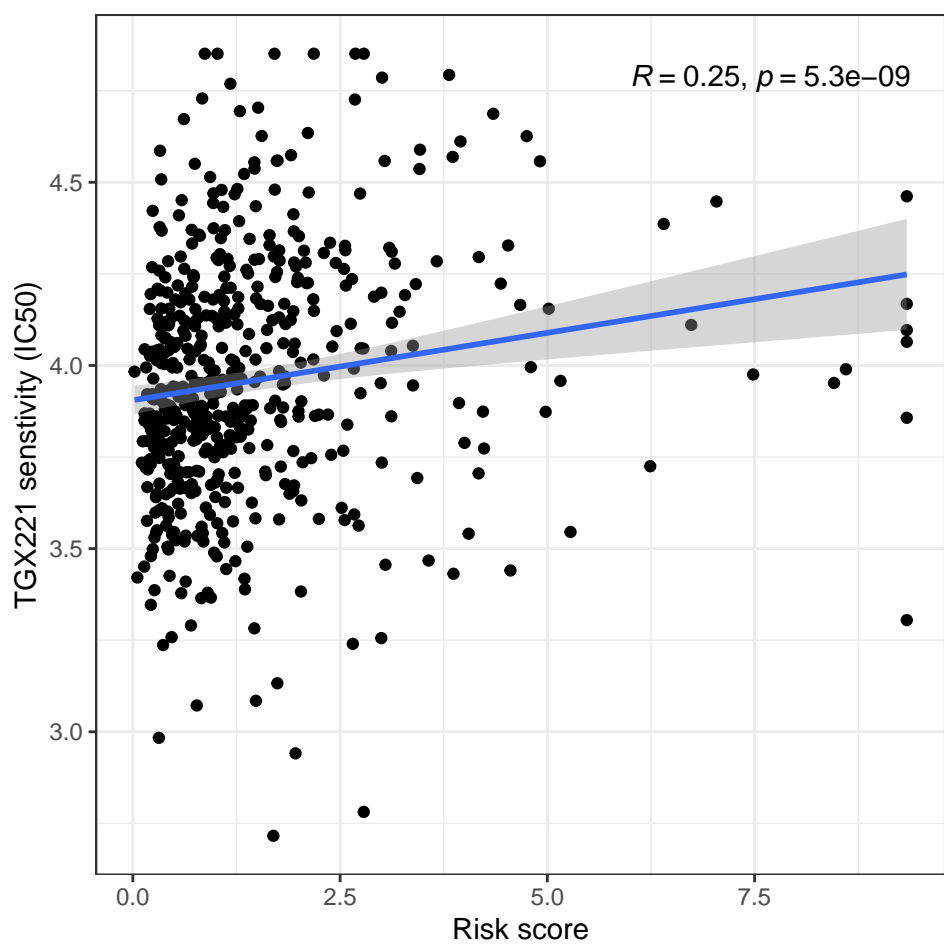

Supplement: s1 [file s1]

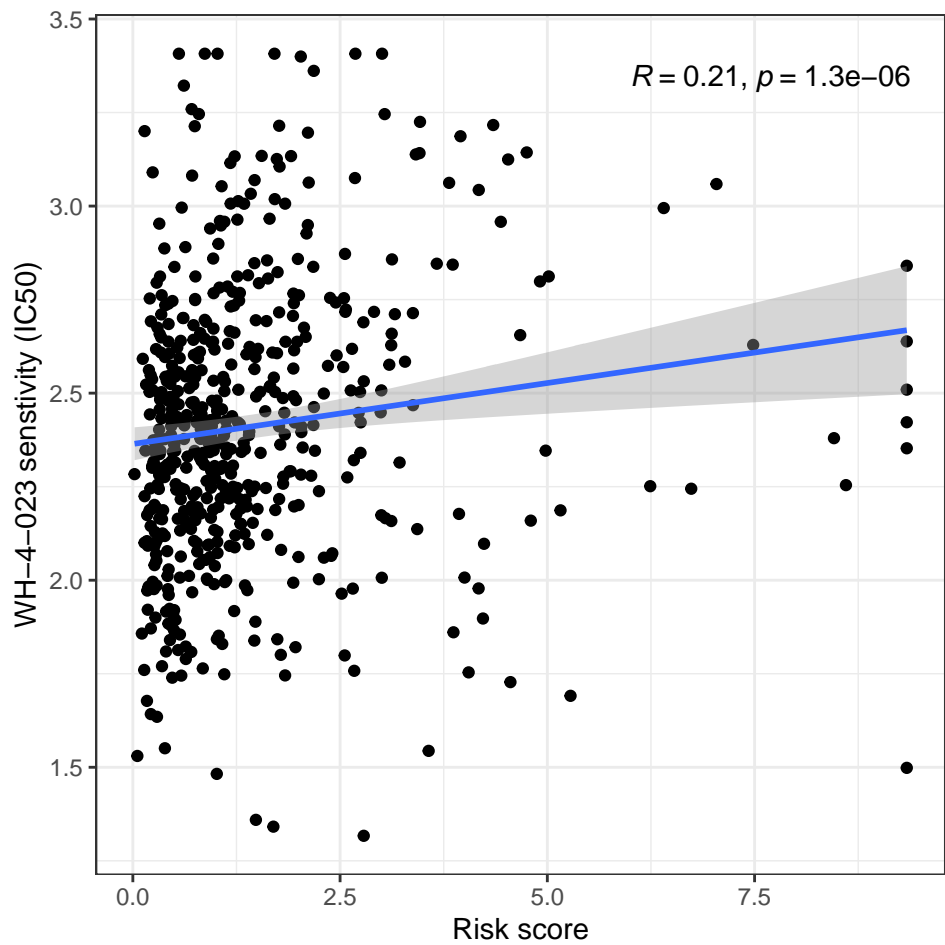

Supplement: s1 [file s1]

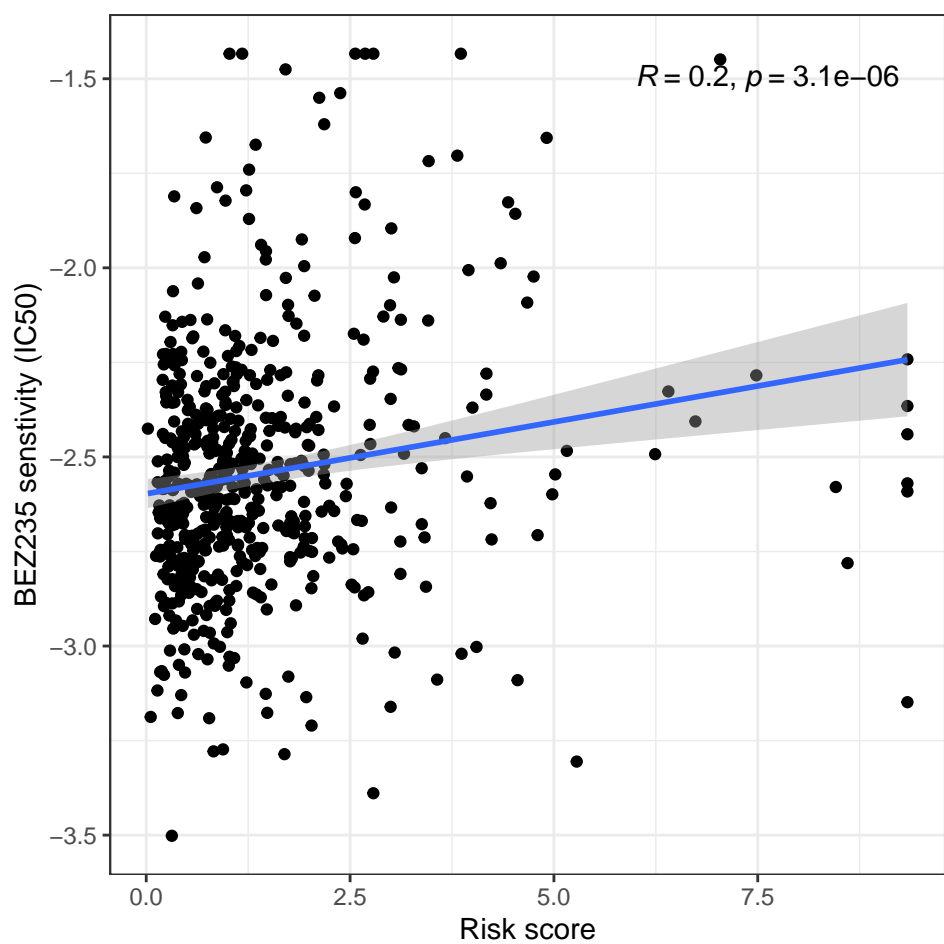

Supplement: s1 [file s1]

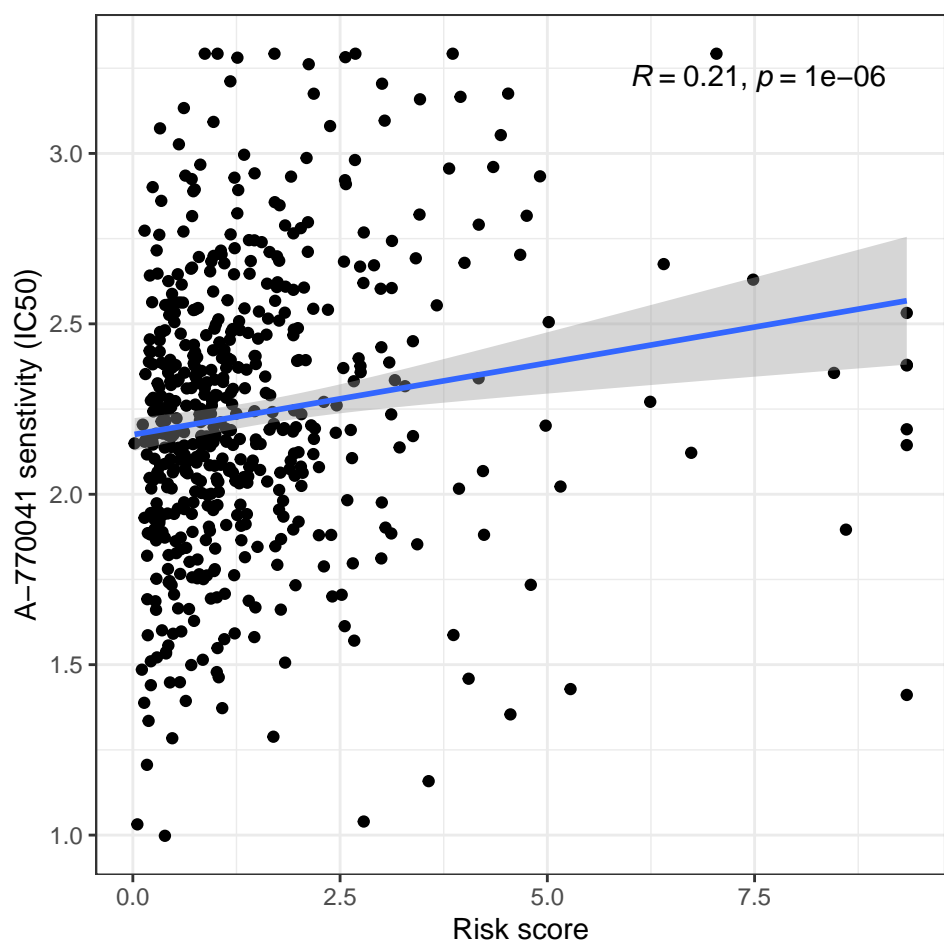

Supplement: s1 [file s1]

Risk  low  high

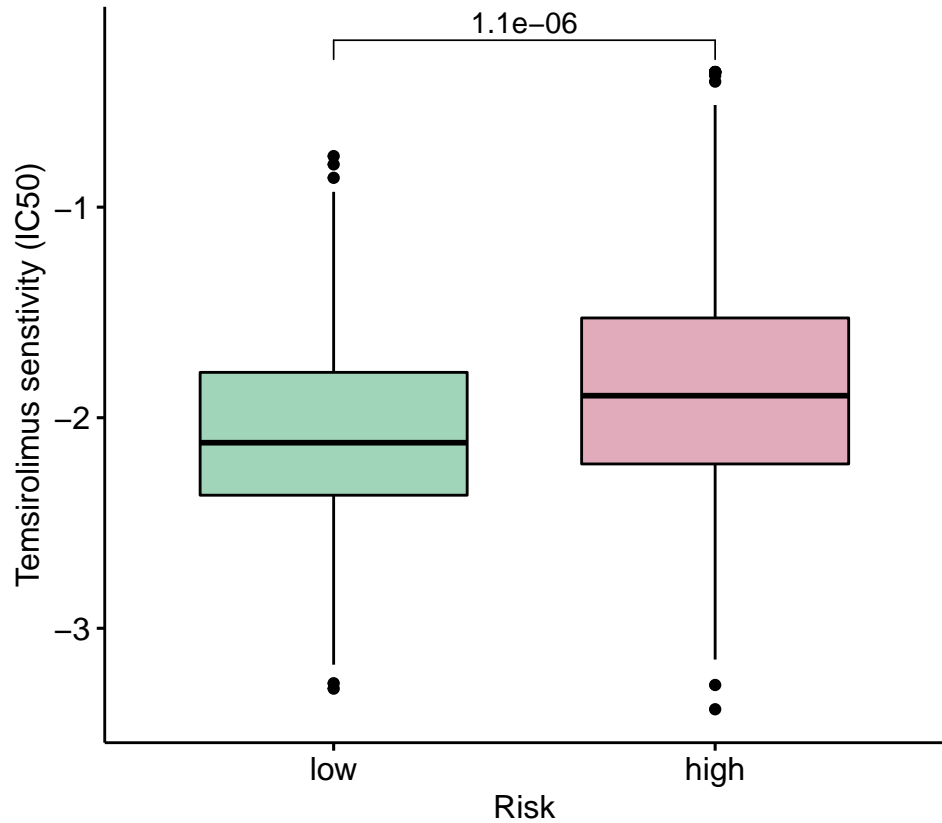

Supplement: s1 [file s1]

Dasatinib sensitivity (IC50)

Risk  low  high

$3.3\text{e-}07$

low

high

Risk

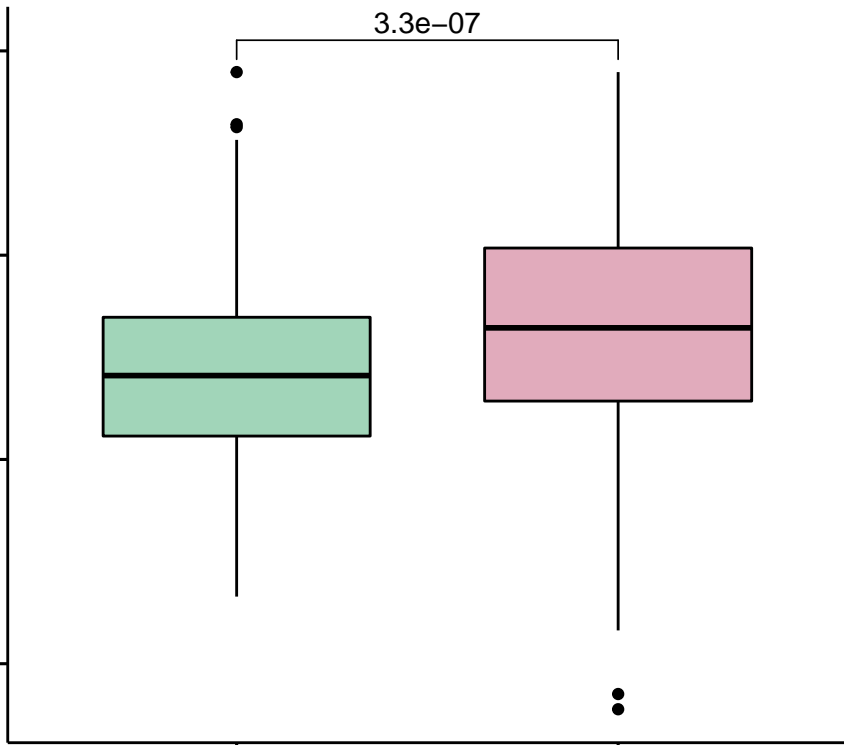

Supplement: s1 [file s1]

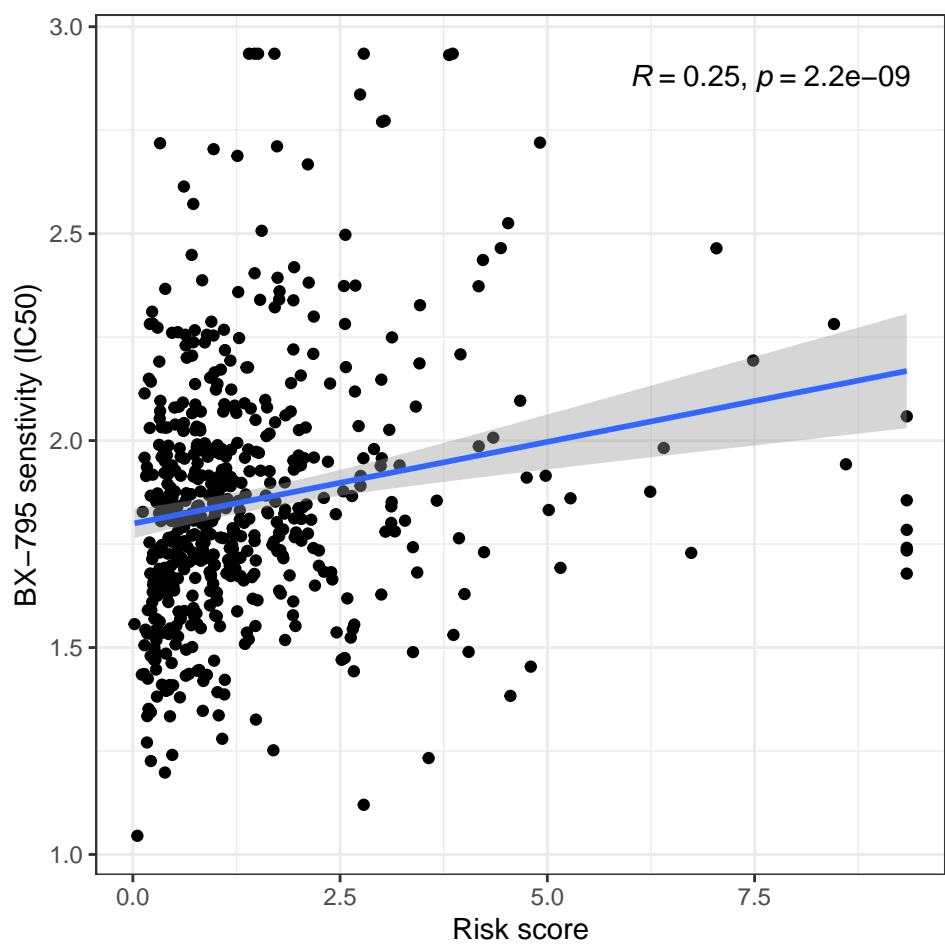

Supplement: s1 [file s1]

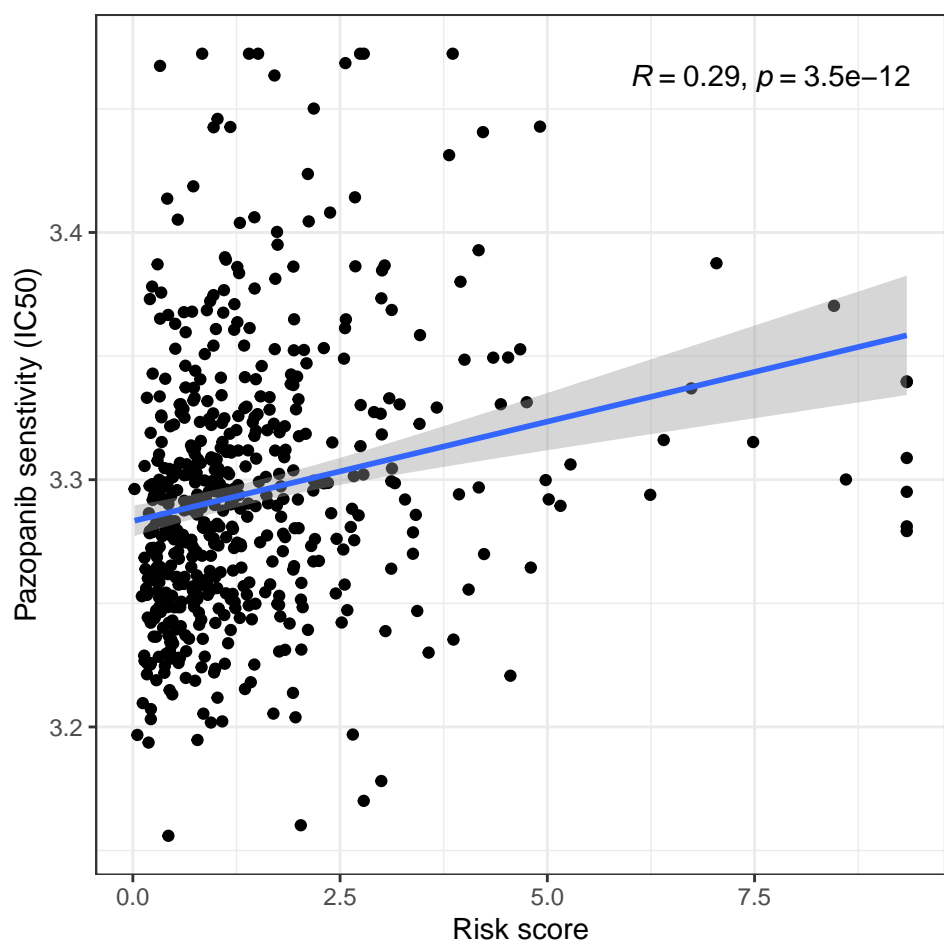

Supplement: s1 [file s1]

Risk  low  high

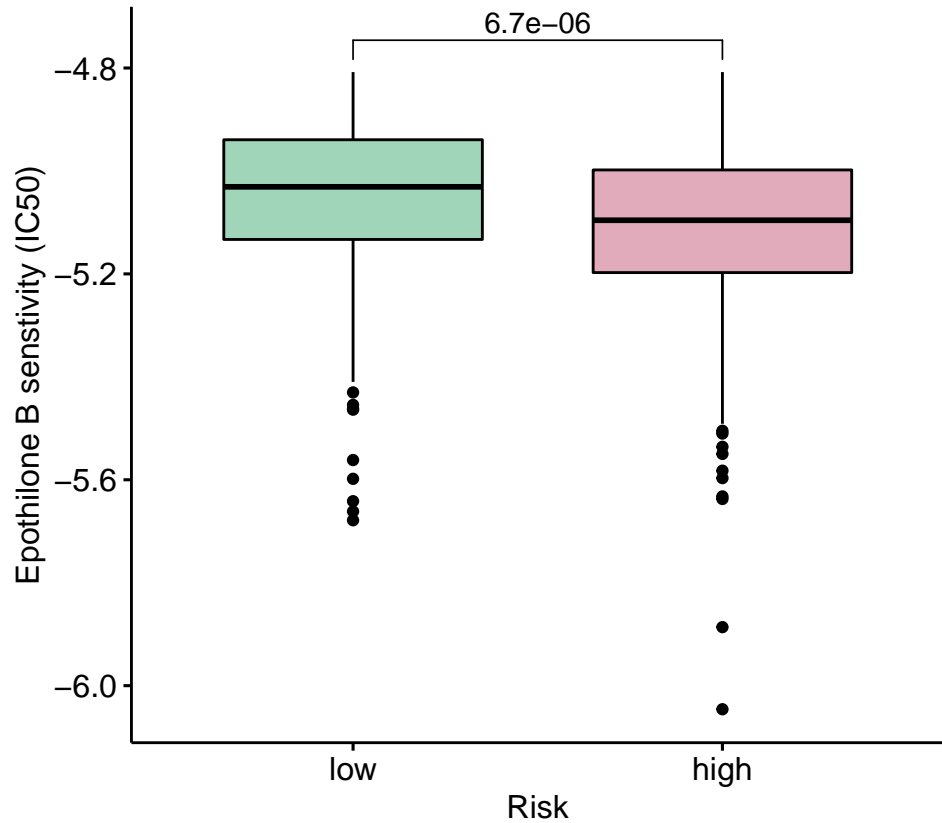

Supplement: s1 [file s1]

Risk  low  high

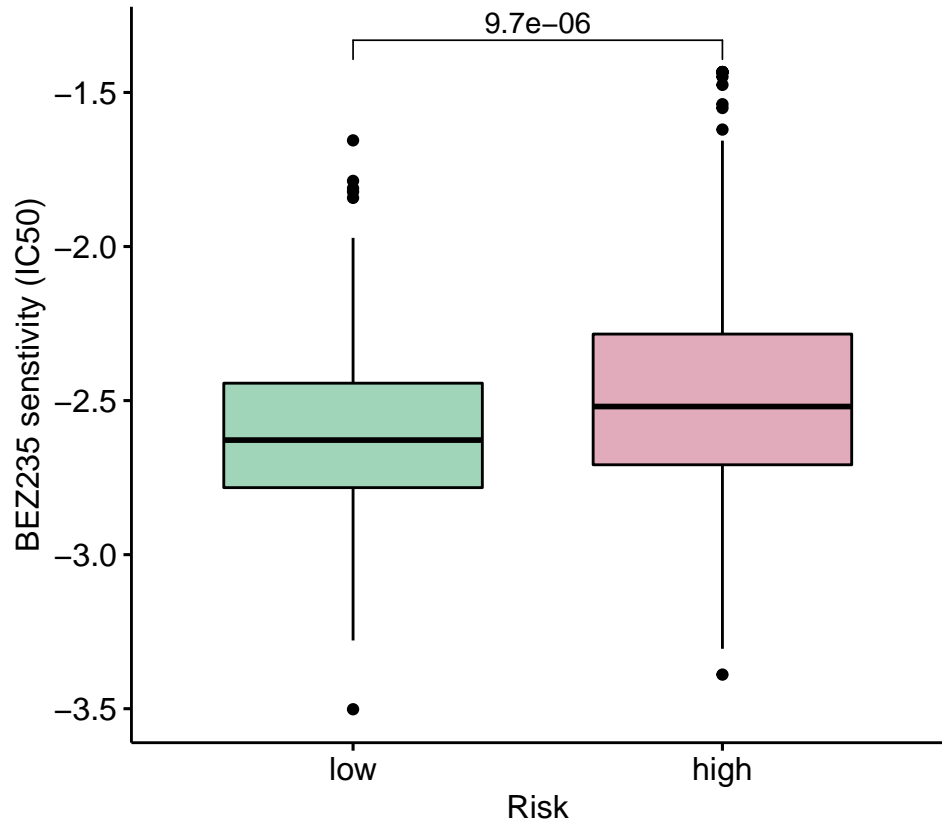

Supplement: s1 [file s1]

Risk  low  high

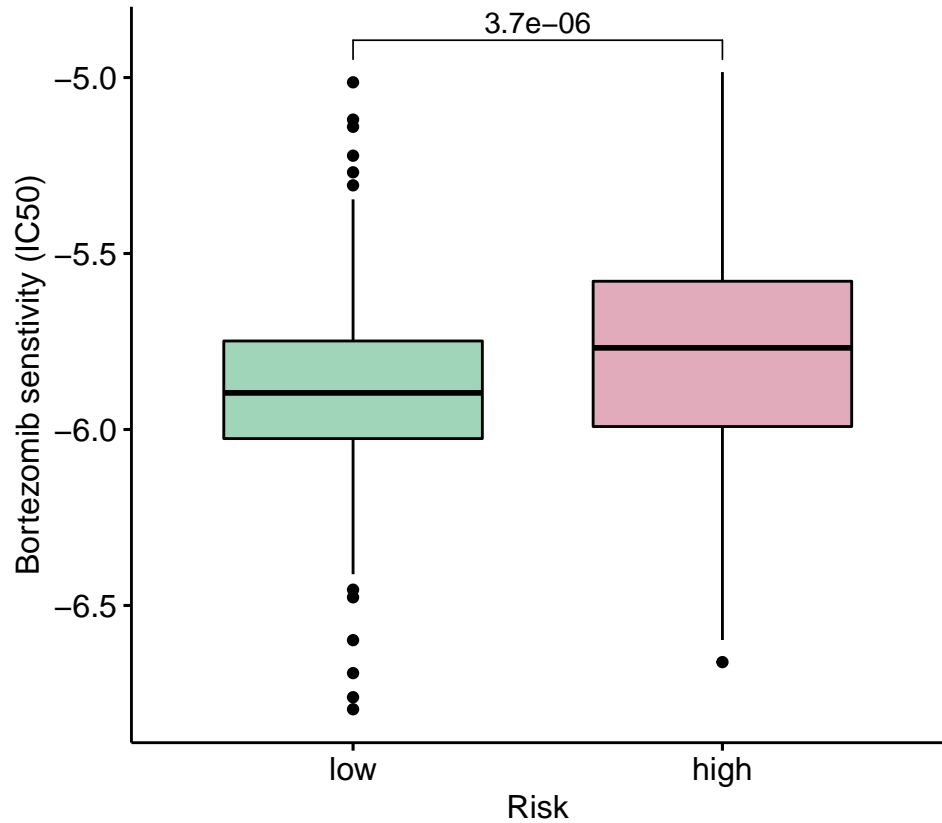

Supplement: s1 [file s1]

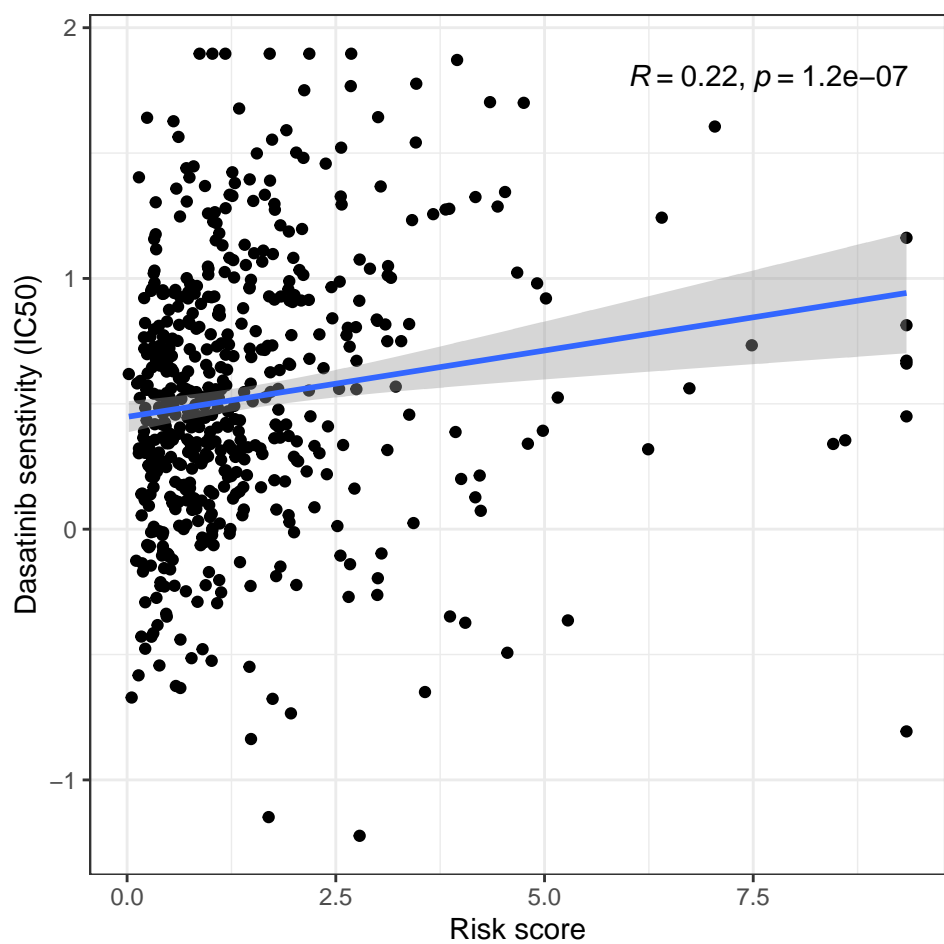

Supplement: s1 [file s1]

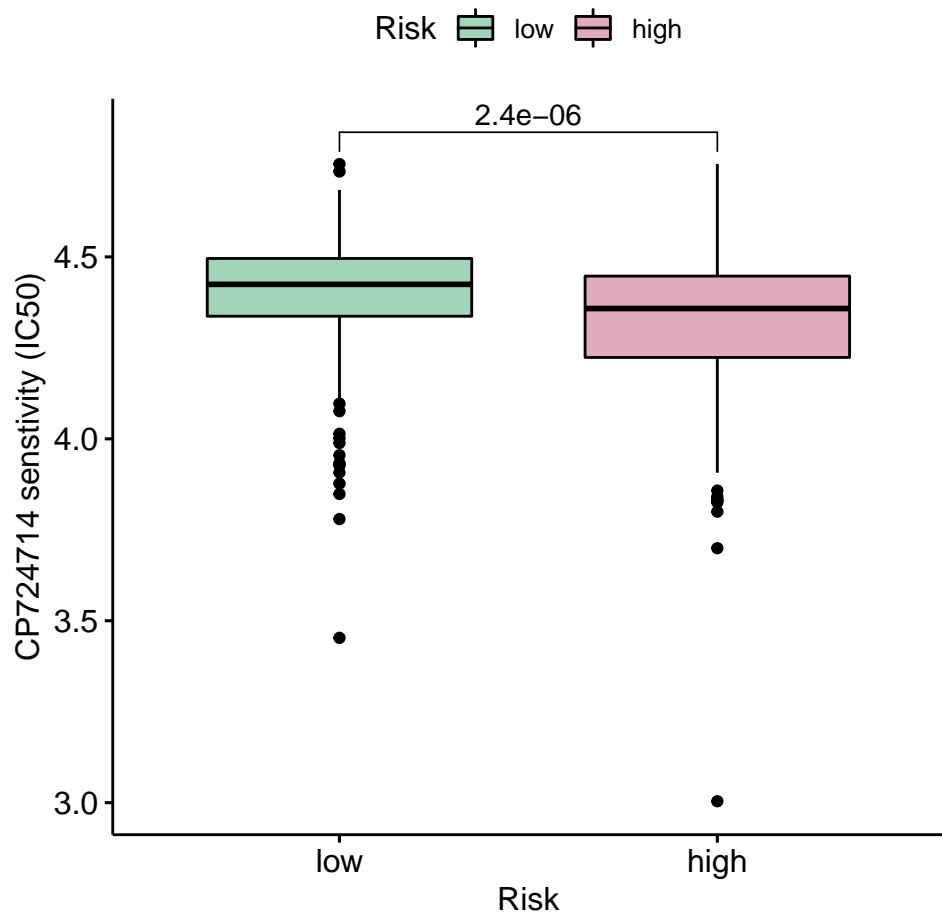

Supplement: s1 [file s1]

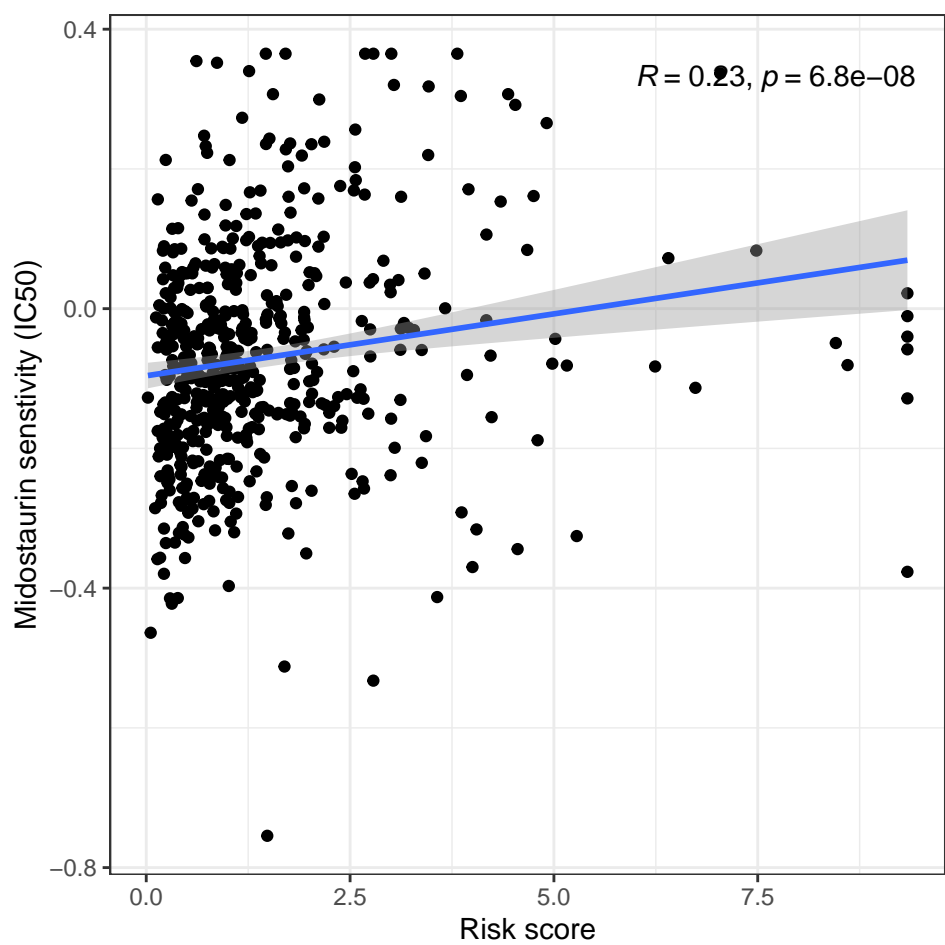

Supplement: s1 [file s1]

Risk  low  high

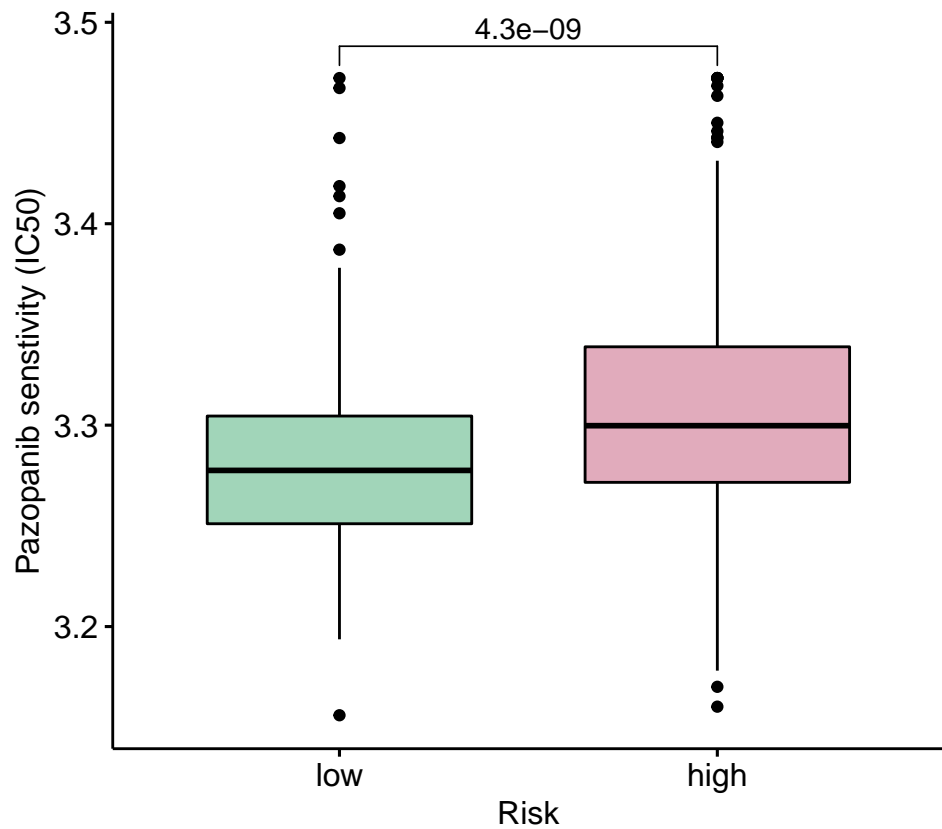

Supplement: s1 [file s1]

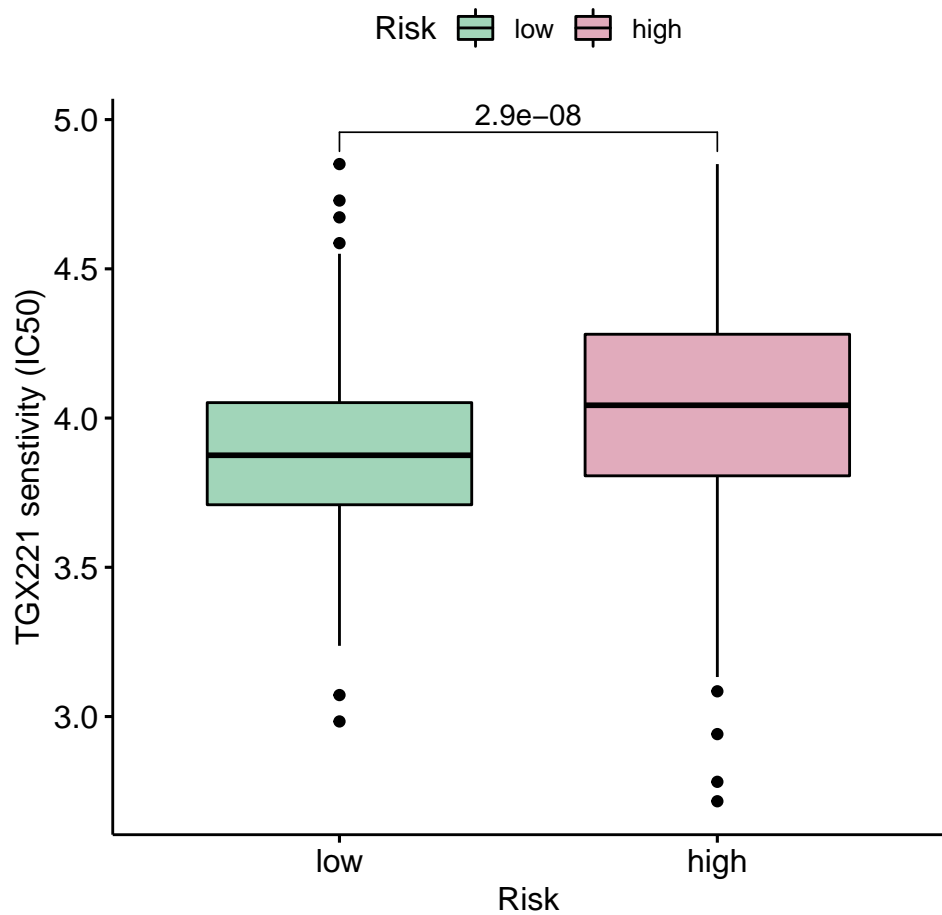

Supplement: s1 [file s1]

Risk  low  high

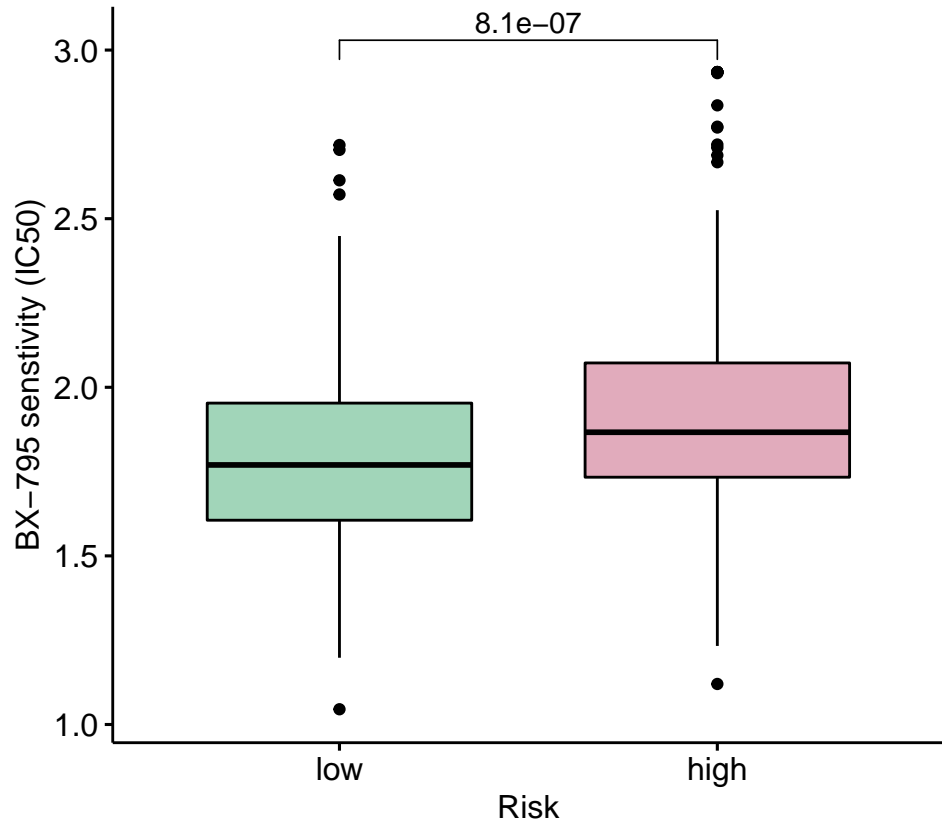

Supplement: s1 [file s1]

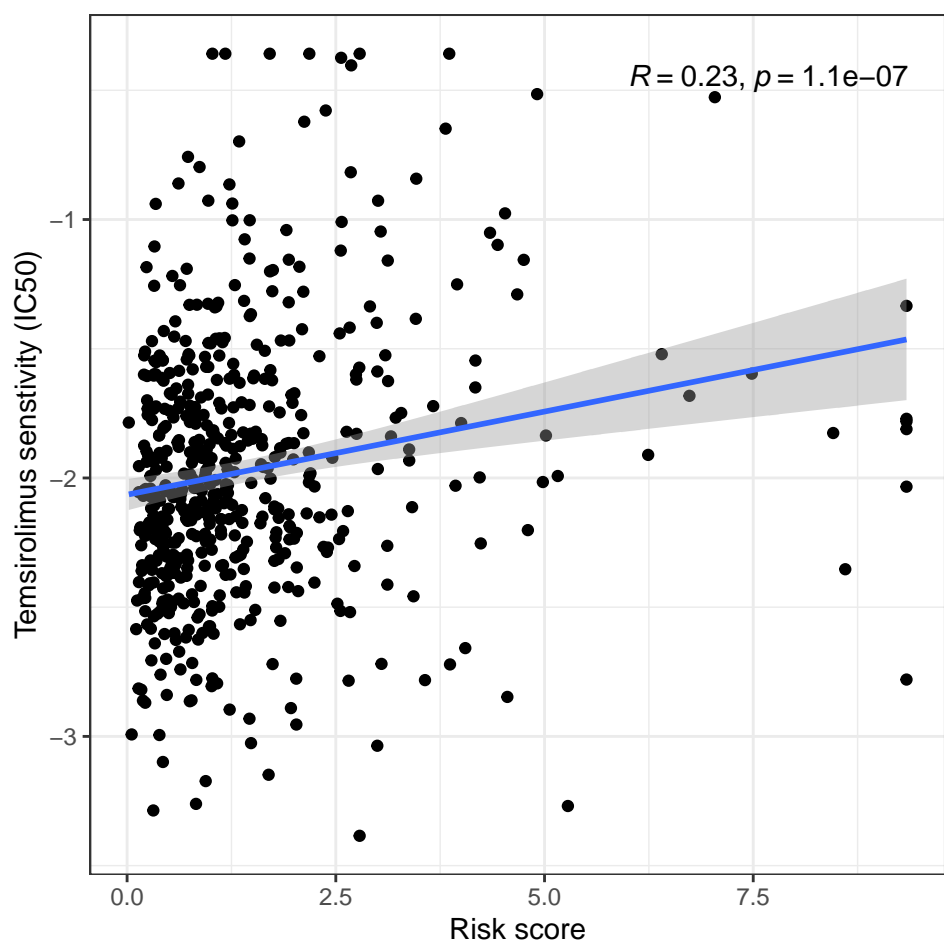

Supplement: s1 [file s1]

Risk  low  high

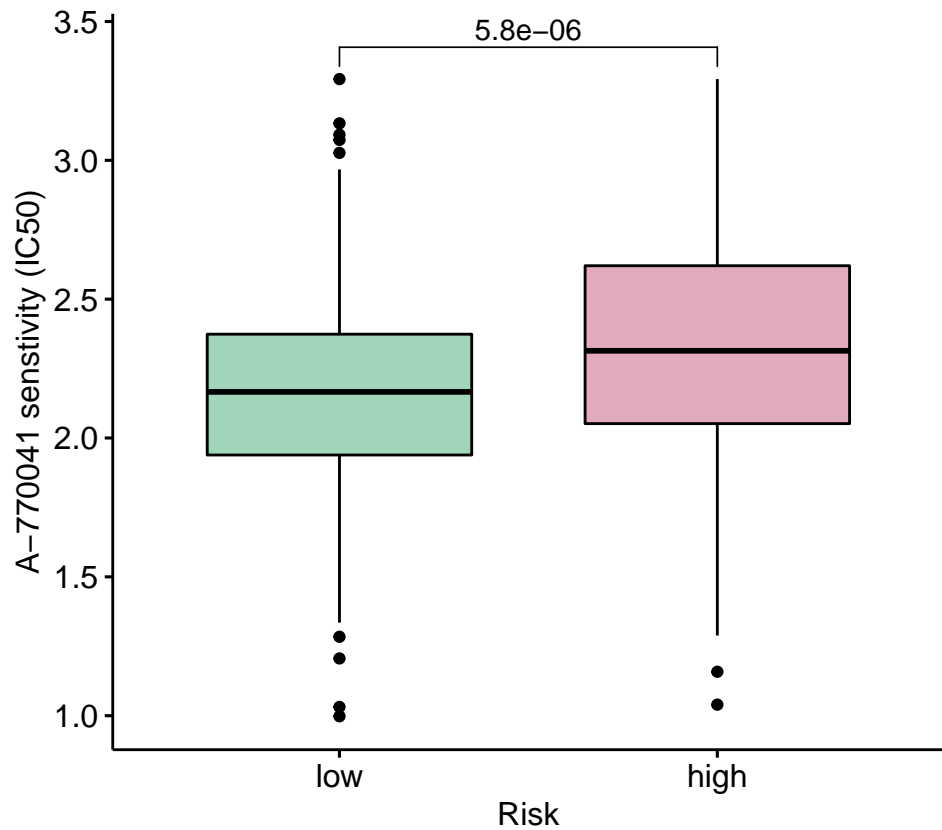

Supplement: s1 [file s1]

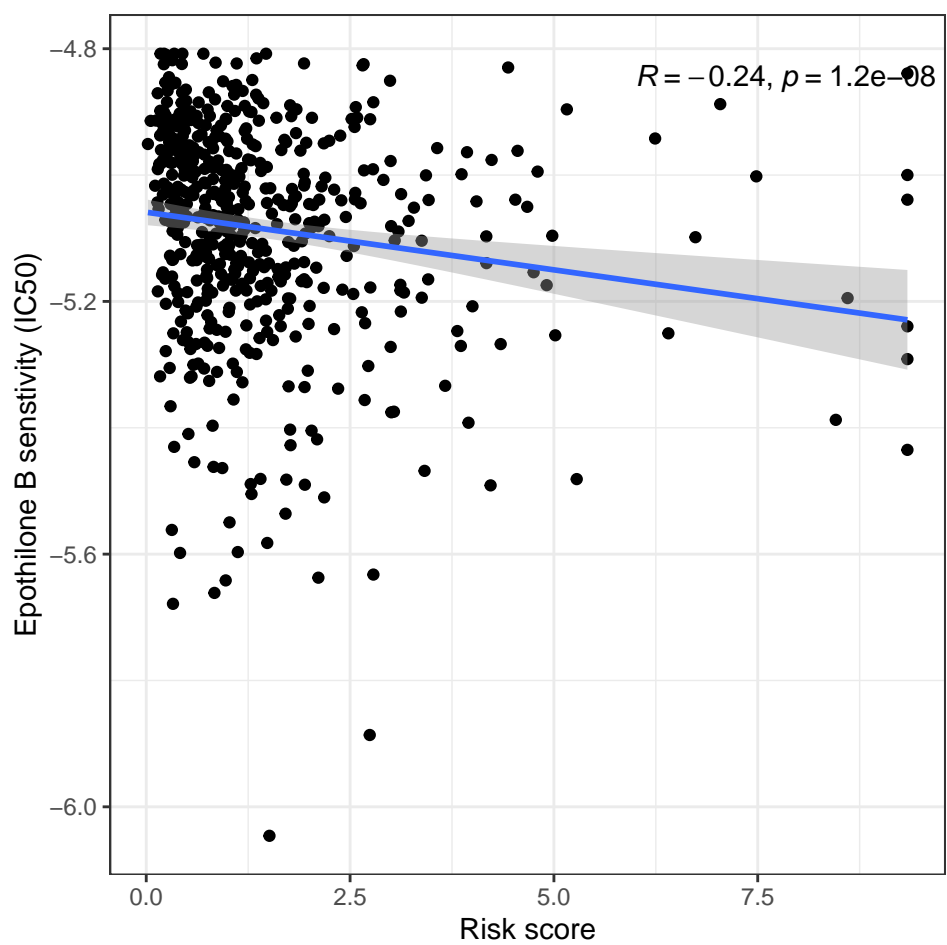

Supplement: s1 [file s1]

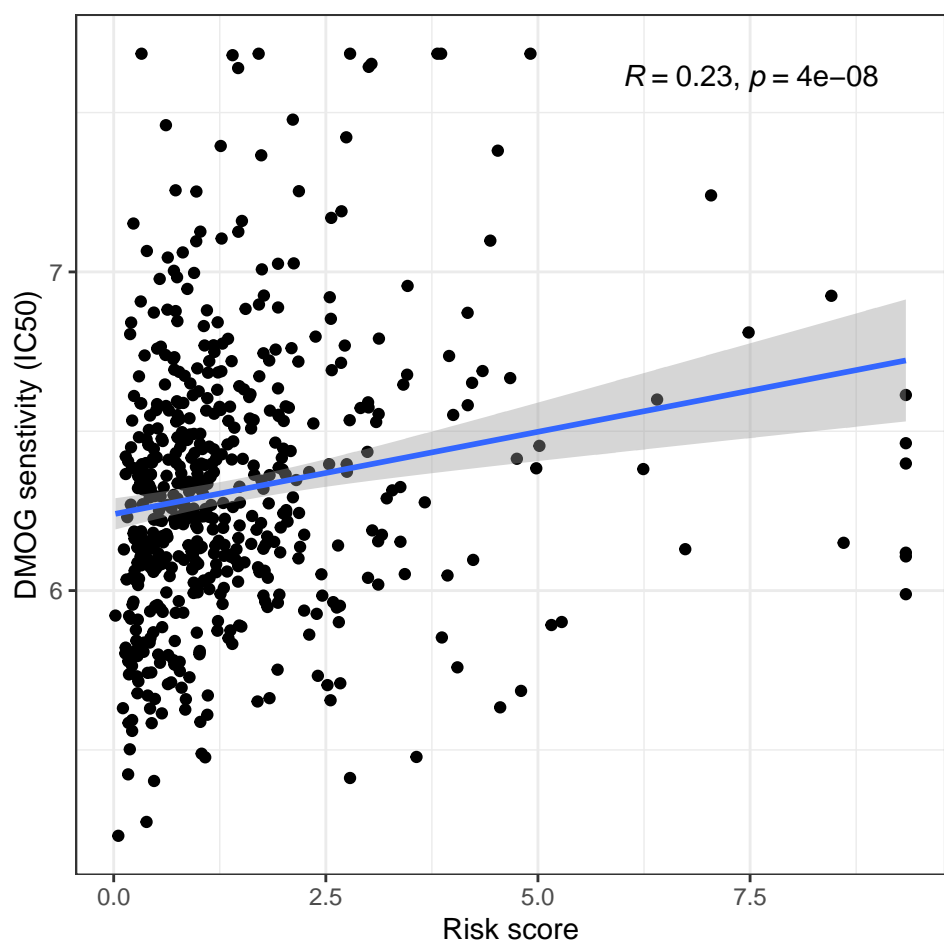

Supplement: s1 [file s1]

Midostaurin sensitivity (IC50)

Risk  low  high

$3.8e-07$

low

high

Risk

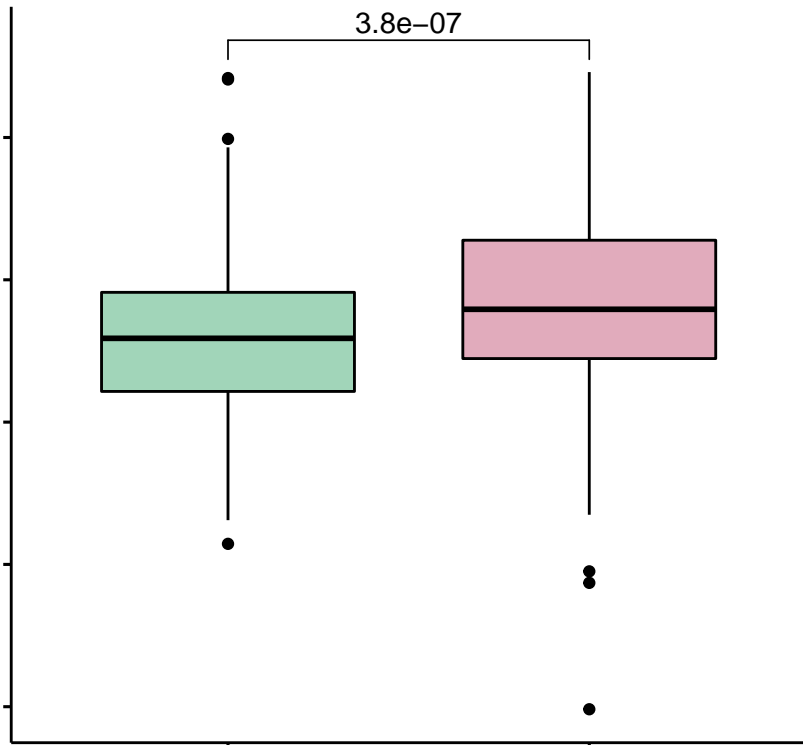

Supplement: s1 [file s1]
